# Supplementary material
Source: PubMed Central journal article supplement (PMC6855121)
Supplement: baADV2019000564-suppl1.pdf [file baADV2019000564-suppl1.pdf]

**Supplementary Information for**  
**The overexpression of *WT1* and *PRAME* predicts poor outcomes of**  
**myelodysplastic syndromes patients with thrombocytopenia**

**Table of Contents**

| <b>Content</b>                                                                                                                   | <b>Page</b> |
|----------------------------------------------------------------------------------------------------------------------------------|-------------|
| Supplementary Tables                                                                                                             |             |
| Table S1. International working group response criteria of MDS                                                                   | 2           |
| Table S2. <i>WT1</i> and <i>PRAME</i> transcript levels among three groups                                                       | 3           |
| Table S3. Clinical profile of MDS patients with thrombocytopenia in low risk                                                     | 3           |
| Table S4. Characteristics of allo-HSCT patients                                                                                  | 5           |
| Table S5. Characteristics of MDS patients undergoing chemotherapy and HMA                                                        | 7           |
| Supplementary Figures                                                                                                            |             |
| Figure S1. Majority patients in all three groups had a higher <i>WT1</i> and <i>PRAME</i> transcript level than the normal range | 9           |
| Figure S2. <i>WT1</i> and <i>PRAME</i> transcript levels according to IPSS-R                                                     | 9           |
| Figure S3. ROC curve analysis of <i>WT1</i> (A) and <i>PRAME</i> (B) gene transcript levels and the IPSS-R higher risk rate      | 10          |
| Figure S4. Proportions of patients with <i>WT1</i> and <i>PRAME</i> transcript levels according to platelet count                | 10          |
| Figure S5. OS and PFS of MDS patients according to age group and degree of thrombocytopenia                                      | 11          |
| Figure S6. OS and PFS of MDS patients according to IPSS-R and <i>WT1</i> and <i>PRAME</i> transcript levels                      | 12          |

**Table S1. International working group response criteria of MDS**

| Category                | Response criteria (response must last 4 weeks)                                                                                                                                                                                                                                                                                                                                                                                                                                                                                                                                                                          |
|-------------------------|-------------------------------------------------------------------------------------------------------------------------------------------------------------------------------------------------------------------------------------------------------------------------------------------------------------------------------------------------------------------------------------------------------------------------------------------------------------------------------------------------------------------------------------------------------------------------------------------------------------------------|
| Complete remission (CR) | <p>Bone marrow: <math>\leq 5\%</math> myeloblasts with normal maturation of all cell lines</p> <p>Persistent dysplasia will be noted</p> <p>Peripheral blood</p> <p>Hemoglobin <math>\geq 11</math> g/dL</p> <p>Platelets <math>\geq 100 \times 10^9/L</math></p> <p>Neutrophils <math>\geq 1.0 \times 10^9/L</math></p> <p>Blasts 0%</p>                                                                                                                                                                                                                                                                               |
| Progression             | <p>For patients with:</p> <p>Less than 5% blasts: <math>\geq 50\%</math> increase in blasts to <math>&gt; 5\%</math> blasts</p> <p>5%-10% blasts: <math>\geq 50\%</math> increase to <math>&gt; 10\%</math> blasts</p> <p>10%-20% blasts: <math>\geq 50\%</math> increase to <math>&gt; 20\%</math> blasts</p> <p>20%-30% blasts: <math>\geq 50\%</math> increase to <math>&gt; 30\%</math> blasts</p> <p>Any of the following:</p> <p>At least 50% decrement from maximum remission/response in granulocytes or platelets</p> <p>Reduction in hemoglobin by <math>\geq 2</math> g/dL</p> <p>Transfusion dependence</p> |
| Survival                | <p>Endpoints</p> <p>Overall survival: death from any cause</p> <p>PFS: disease progression or death from MDS</p>                                                                                                                                                                                                                                                                                                                                                                                                                                                                                                        |

**Table S2. *WT1* and *PRAME* transcript levels among three groups**

|                                    | <i>WT1</i> transcript levels | <i>PRAME</i> transcript levels |
|------------------------------------|------------------------------|--------------------------------|
| MDS with isolated thrombocytopenia | 1.80 (0.29-5.50)             | 1.10 (0.14-19.70)              |
| MDS with bicytopenia               | 1.70 (0.30-7.90)             | 1.05 (0.18-20.75)              |
| MDS with pancytopenia              | 2.80 (0.64-10.50)            | 0.97 (0.24-19.08)              |

Data are median (IQR). MDS: myelodysplastic syndromes. *WT1*: Wilms tumor 1. *PRAME*: Preferentially expressed antigen of melanoma.

**Table S3. Clinical profile of MDS patients with thrombocytopenia in low risk**

| Feature                         | Low-favorable group<br>N=53 | Low-adverse group<br>N=50 | <i>P</i> |
|---------------------------------|-----------------------------|---------------------------|----------|
| <b>Age at diagnosis (years)</b> | 50.0(30.5-65.0)             | 52.5(36.7-64.2)           | 0.502    |
| <b>Sex</b>                      |                             |                           | 0.896    |
| Female                          | 29(54.7%)                   | 28(56.0%)                 |          |
| Male                            | 24(45.3%)                   | 22(44.0%)                 |          |
| <b>Cytopenias</b>               |                             |                           |          |
| HGB (g/dL)                      | 103(88-115)                 | 107(95.75-120)            | 0.443    |
| ANC ( $\times 10^9/L$ )         | 2.14(1.20-3.09)             | 1.99(1.21-2.53)           | 0.476    |
| Platelet ( $\times 10^9/L$ )    | 39.0(24.0-50.5)             | 56.0(33.3-76.0)           | 0.855    |
| Severe thrombocytopenia         | 15(28.3%)                   | 9(18.0%)                  | 0.216    |
| <b>Bone marrow blasts (%)</b>   | 1.0(0-2.0)                  | 2.0(1.0-2.6)              | 0.099    |
| <b>WHO classification</b>       |                             |                           | 0.175    |
| MDS-SLD                         | 15(28.3%)                   | 18(36.0%)                 |          |
| MDS-MLD                         | 2(3.8%)                     | 7(14.0%)                  |          |
| MDS-RS                          | 0                           | 0                         |          |
| 5q-                             | 0                           | 0                         |          |
| MDS-EB-1                        | 4(7.5%)                     | 3(6.0%)                   |          |

|                         |                |                |              |
|-------------------------|----------------|----------------|--------------|
| MDS-EB-2                | 0              | 0              |              |
| MDS-U                   | 32(60.4%)      | 22(44.0%)      |              |
| <b>Cytogenetic risk</b> |                |                | <b>0.527</b> |
| Very good               | 1(1.9%)        | 0              |              |
| Good                    | 42(79.2%)      | 39(78.0%)      |              |
| Intermediate            | 9(17.0%)       | 11(22.0%)      |              |
| Poor                    | 1(1.9%)        | 0              |              |
| Very poor               | 0              | 0              |              |
| <b>AML evolution</b>    | <b>2(3.8%)</b> | <b>3(6.0%)</b> | <b>0.601</b> |

---

Data are n (%) or median (IQR). HGB: hemoglobin. ANC: absolute neutrophil count. WBC: white blood cell. MDS-SLD: MDS with single-lineage dysplasia. MDS-MLD: MDS with multilineage dysplasia. MDS-RS: MDS with ring sideroblasts. MDS-EB: MDS with excess blasts. MDS-U: MDS-unclassifiable. 5q-: MDS with isolated del(5q).

**Table S4. Characteristics of allo-HSCT patients**

| Feature                             | Patients   |
|-------------------------------------|------------|
|                                     | N=124      |
| Age (years)                         | 39(28, 50) |
| Sex (M/F)                           |            |
| Male                                | 78(62.9%)  |
| Female                              | 46(37.1%)  |
| Interval from diagnosis to HSCT mo, |            |
| Median (IQR)                        |            |
| S-AML, n(%)                         | 64(51.6%)  |
| WHO subtype, n(%)                   |            |
| MDS-SLD                             | 10(8.1%)   |
| MDS-MLD                             | 4(3.2%)    |
| MDS-RS                              | 0          |
| 5q-                                 | 0          |
| MDS-EB-1                            | 34(27.4%)  |
| MDS-EB-2                            | 61(49.2%)  |
| MDS-U                               | 15(12.1%)  |
| Cytogenetics, n(%)                  |            |
| Very good                           | 0          |
| Good                                | 65(52.4%)  |
| Intermediate                        | 37(29.8%)  |
| Poor                                | 12(9.7%)   |
| Very poor                           | 10(8.1%)   |
| IPSS-R                              |            |
| Intermediate                        | 24(19.3%)  |
| High                                | 47(37.9%)  |
| Very high                           | 53(42.7%)  |
| Patient-donor sex matching, n(%)    |            |

|                      |           |
|----------------------|-----------|
| M-M                  | 40(32.3%) |
| M-F                  | 37(29.8%) |
| F-F                  | 20(16.1%) |
| F-M                  | 27(21.8%) |
| HLA match, n(%)      | 36(29.0%) |
| Donor relation, n(%) |           |
| MUD                  | 1(0.8%)   |
| MMURD                | 0         |
| MRD                  | 34(27.4%) |
| MMRD                 | 89(71.8%) |

---

Data are n (%) or median(IQR). M: male. F: female. S-AML: secondary acute myeloid leukemia. WHO: World Health Organization. MDS-SLD: MDS with single lineage dysplasia. MDS-MLD: MDS with multilineage dysplasia. MDS-RS: MDS with ring sideroblasts. MDS-EB: MDS with excess blasts. MDS-U: MDS-unclassifiable. 5q-: MDS with isolated del(5q). IPSS-R: Revised International Prognostic Scoring System. MRD: matched related donor. MURD: matched unrelated donor. MMRD: mismatched related donor. MMURD: mismatched unrelated donor.

**Table S5. Characteristics of MDS patients undergoing chemotherapy and HMA**

| Feature              | Patients       |
|----------------------|----------------|
|                      | N=50           |
| Age (years)          | 59(49.8, 64.0) |
| Sex                  |                |
| Male                 | 32(64.0%)      |
| Female               | 18(36.0%)      |
| S-AML, n(%)          | 37(74.0%)      |
| WHO subtype, n(%)    |                |
| MDS-SLD              | 1(2.0%)        |
| MDS-MLD              | 2(4.0%)        |
| MDS-RS               | 0              |
| 5q-                  | 0              |
| MDS-EB-1             | 11(22.0%)      |
| MDS-EB-2             | 34(68.0%)      |
| MDS-U                | 2(4.0%)        |
| Cytogenetics, n(%)   |                |
| Very good            | 0              |
| Good                 | 26(52.0%)      |
| Intermediate         | 11(22.0%)      |
| Poor                 | 3(6.0%)        |
| Very poor            | 10(20.0%)      |
| IPSS-R               |                |
| Intermediate         | 8(16.0%)       |
| High                 | 17(34.0%)      |
| Very high            | 25(50.0%)      |
| Chemotherapy and HMA |                |
| HMA                  | 33(66.0%)      |
| Chemotherapy         | 17(34.0%)      |

Data are n (%) or median(IQR). M: male. F: female. S-AML: secondary acute myeloid leukemia. WHO: World Health Organization.

MDS-SLD: MDS with single lineage dysplasia. MDS-MLD: MDS with multilineage dysplasia. MDS-RS: MDS with ring

sideroblasts. MDS-EB: MDS with excess blasts. MDS-U: MDS-unclassifiable. 5q-: MDS with isolated del(5q). IPSS-R: Revised

International Prognostic Scoring System.



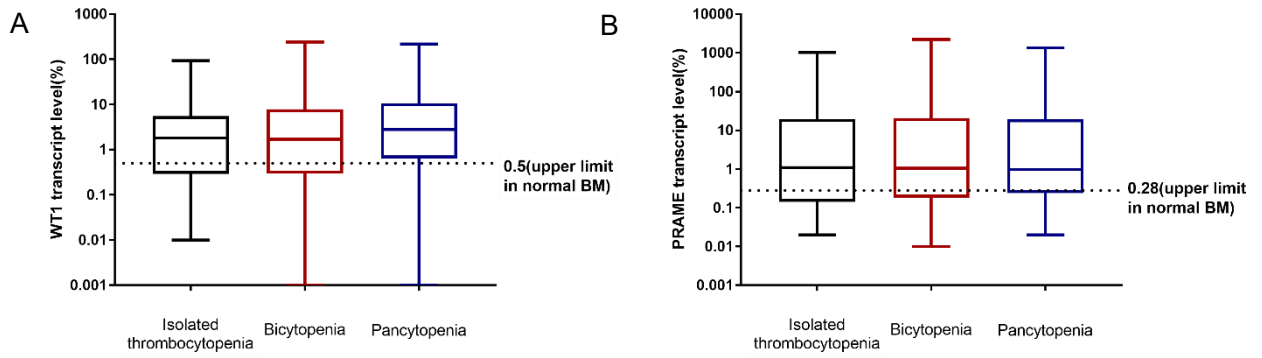

**Figure S1. Majority patients in all three groups had a higher *WT1* (A) and *PRAME* (B) transcript level than the normal range. Additional lines (at 0.5 for *WT1* and 0.28 for *PRAME*) were the upper limit of *WT1* and *PRAME* transcript levels from normal bone marrow.**

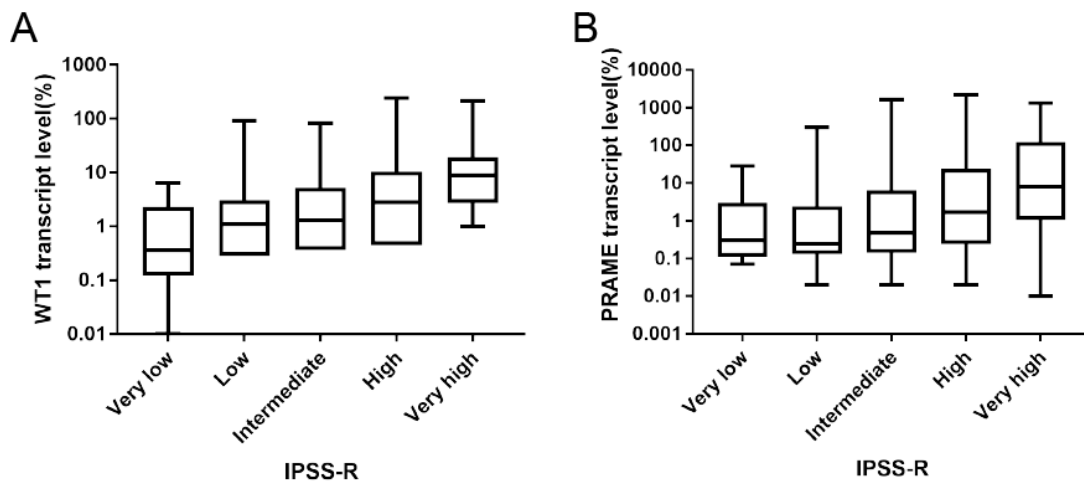

**Figure S2. *WT1* (A) and *PRAME* (B) transcript levels according to IPSS-R. The transcript levels of *WT1* and *PRAME* were higher in the higher-risk group compared with those in the lower-risk group ( $p=0.000$  for *WT1*,  $p=0.001$  for *PRAME*).**

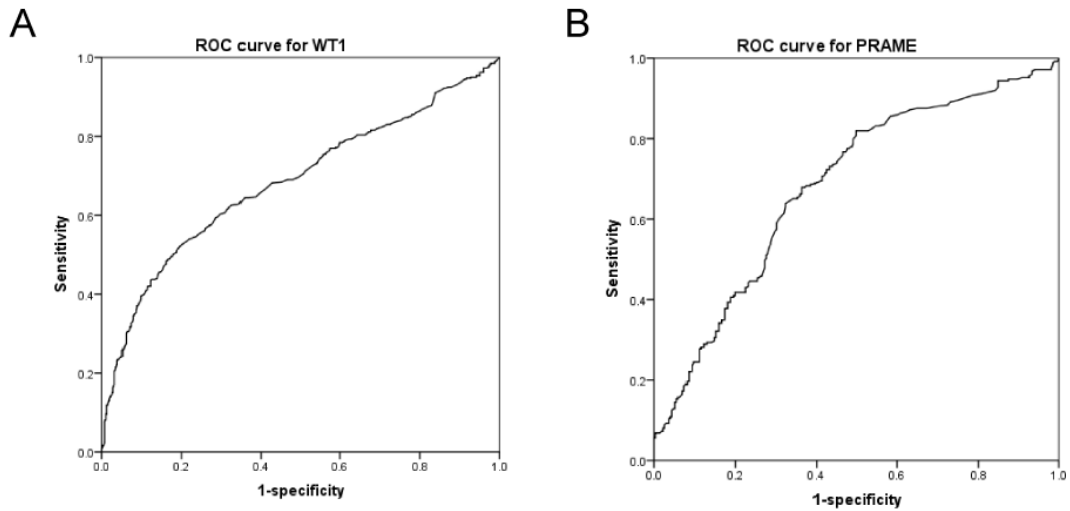

**Figure S3.** ROC curve analysis of *WT1* (A) and *PRAME* (B) gene transcript levels and the IPSS-R higher risk rate.

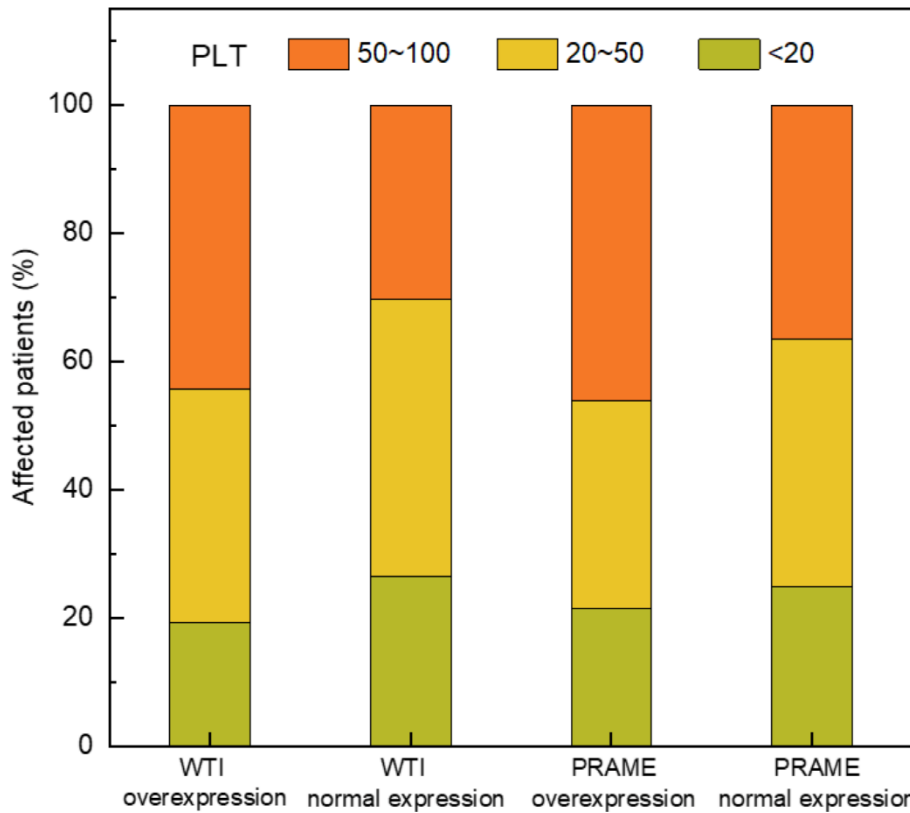

**Figure S4.** Proportions of patients with *WT1* and *PRAME* transcript levels according to platelet count.

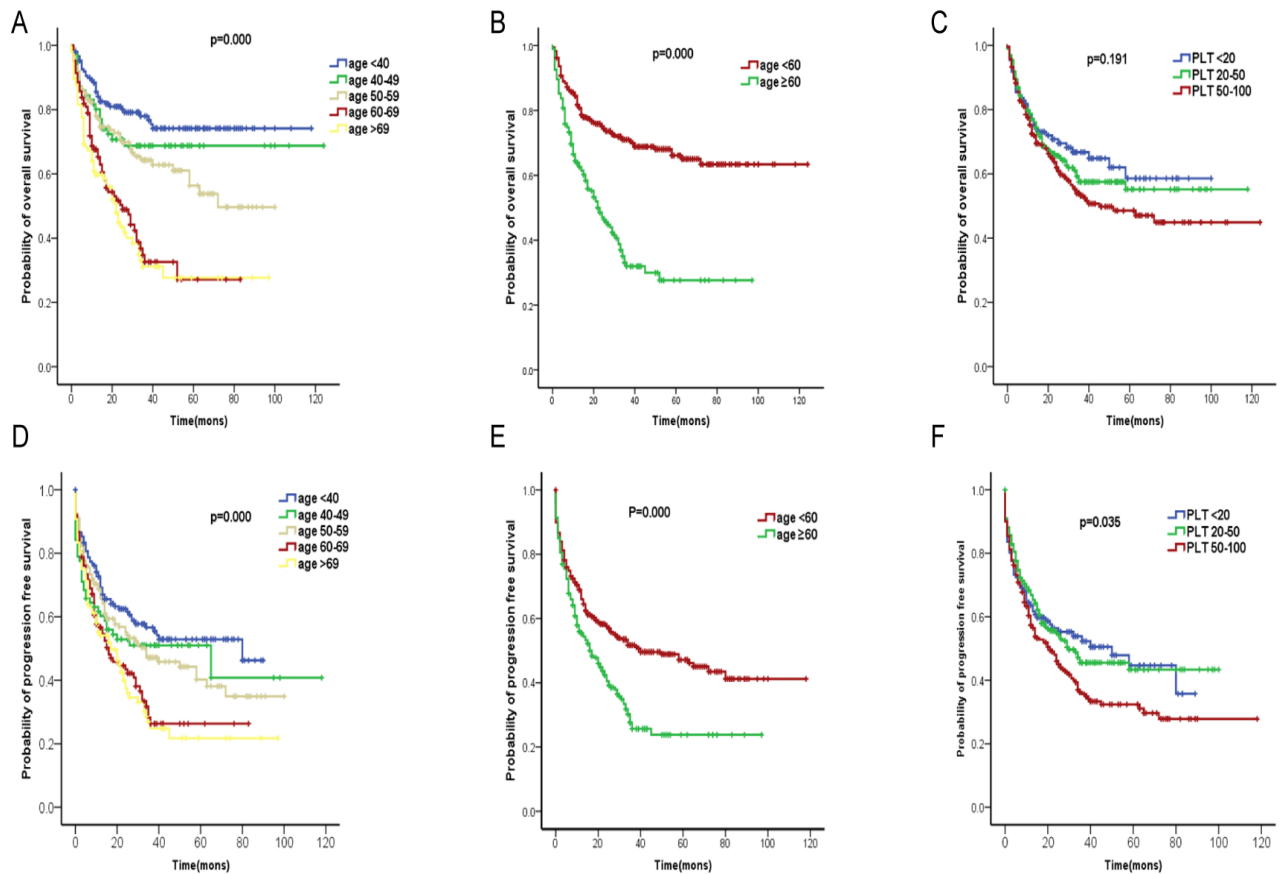

**Figure S5. OS and PFS of MDS patients according to age group and degree of thrombocytopenia.** (A) OS of MDS patients based on age group. (B) OS of MDS patients with age <60 years old compared with older patients. (C) OS of MDS patients based on degree of thrombocytopenia. (D) PFS of MDS patients based on age group. (E) PFS of MDS patients with age <60 years old compared with older patients. (F) PFS of MDS patients based on degree of thrombocytopenia.

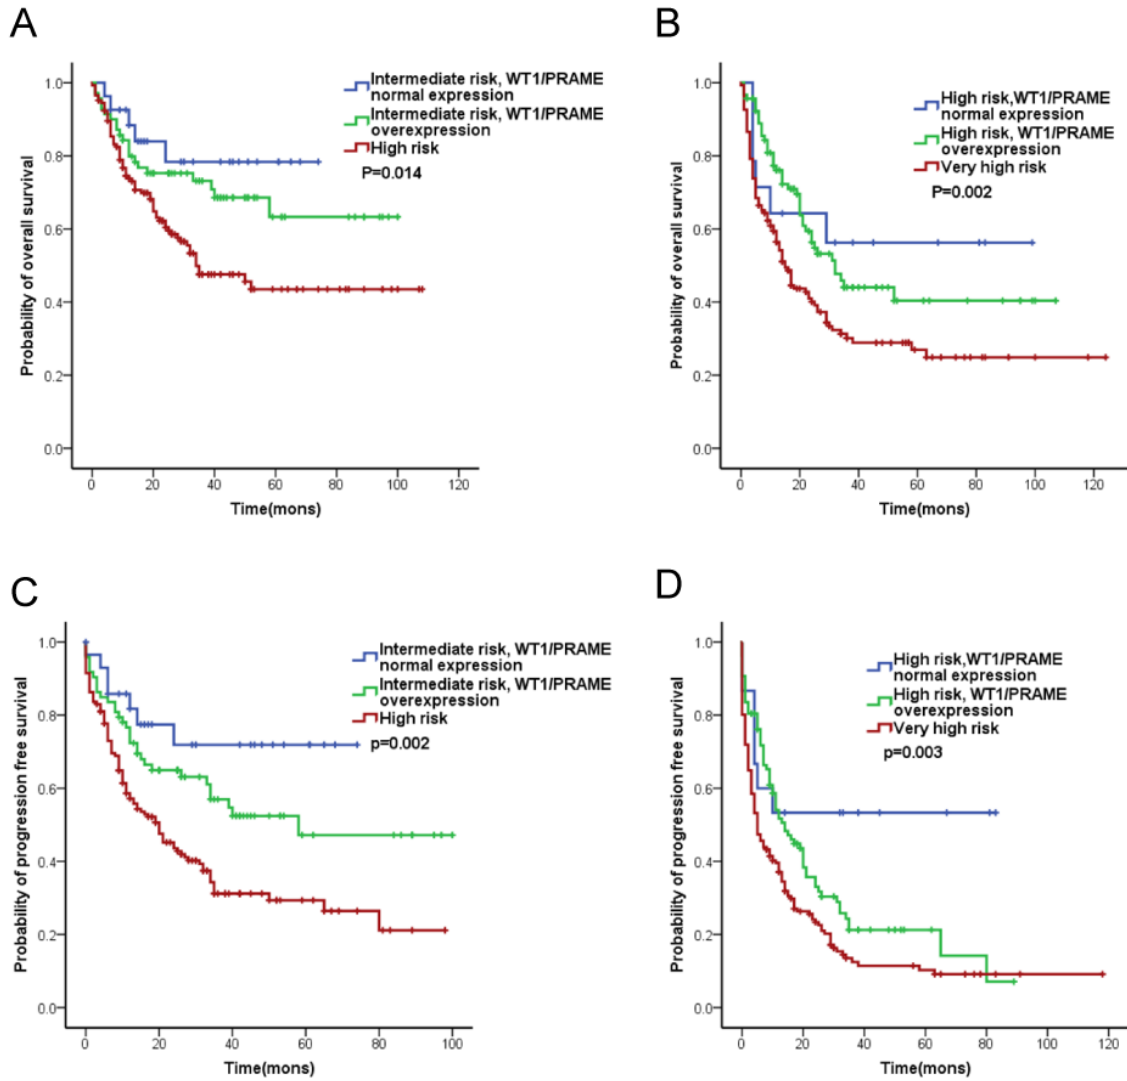

**Figure S6. OS and PFS of MDS patients according to IPSS-R and *WT1* and *PRAME* transcript levels.** (A-D) OS of MDS patients according to the presence and absence of *WT1* or *PRAME* overexpression and according to IPSS risk group. OS (A-B) and PFS (C-D) of MDS patients in the next-highest IPSS risk group are included for the purpose of comparison. P values were calculated between MDS patients with *WT1/PRAME* overexpression for the given IPSS-R risk group and those in the next-highest IPSS risk group. The patients were not enough to calculate p value in very low risk and very high risk group.
